# Supplementary material for: Single-Step Fabrication of a Dual-Sensitive Chitosan Hydrogel by C-Mannich Reaction: Synthesis, Physicochemical Properties, and Screening of its Cu2+ Uptake
Source: MDPI journal article supplement (doi:10.3390/pr11020354), 2023-01-22
Supplement: s1 [file s1]

Archive with 1 entries (1 files):
- processes-2143647 supplementary.pdf
