# Supplementary material for: Single-Step Fabrication of a Dual-Sensitive Chitosan Hydrogel by C-Mannich Reaction: Synthesis, Physicochemical Properties, and Screening of its Cu2+ Uptake
Source: MDPI journal article supplement (doi:10.3390/pr11020354), 2023-01-22
Supplement: s1 [file s1 › processes-2143647 supplementary.pdf]

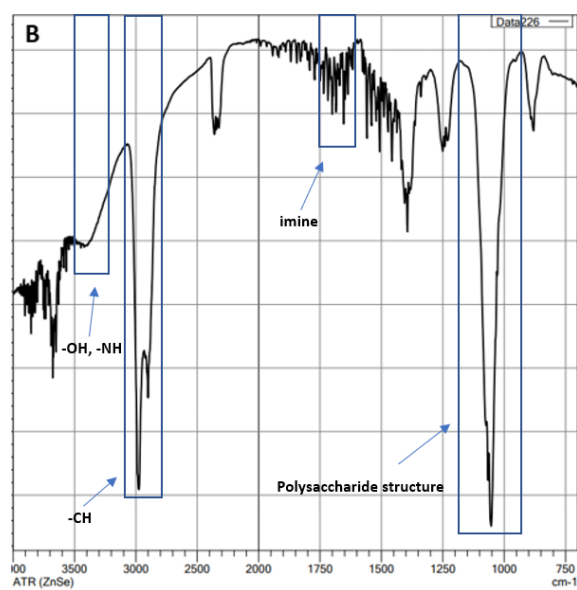

Figure S1. FT-IR of CS-MB ( 1 eq. CS, 20 eq. Glu, 20 eq. 4-HC)

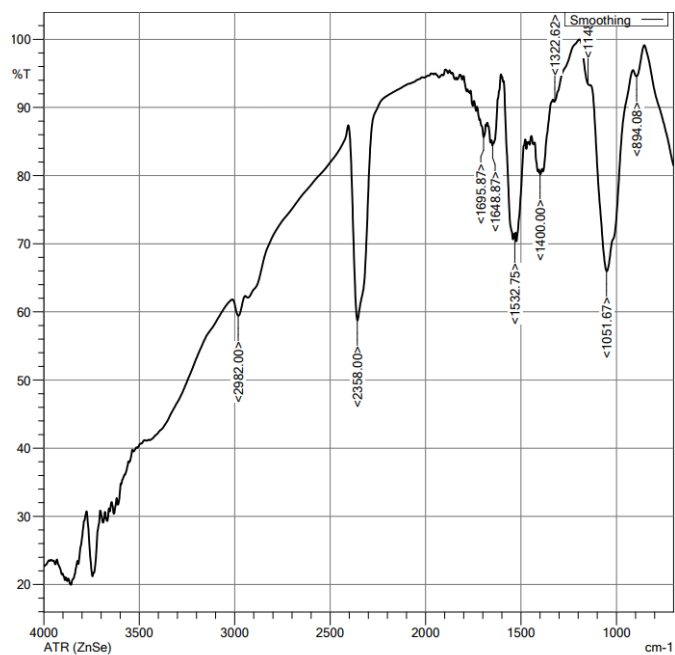

Figure S2. FT-IR of CS hydrogel film

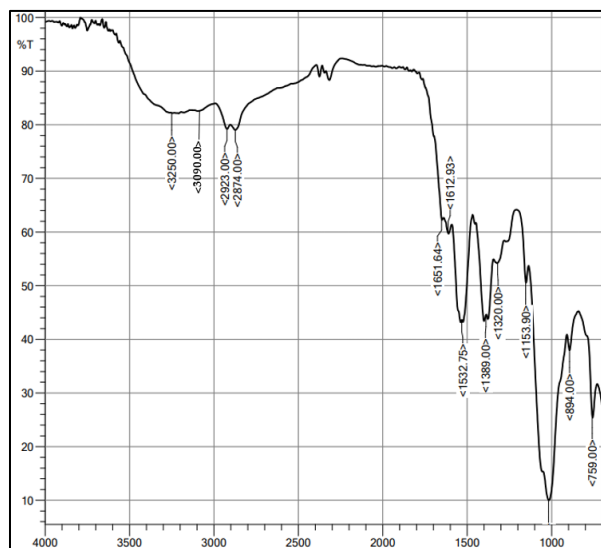

Figure S3. FT-IR of fresh CS-MB (1 eq. CS, 20 eq. Glu, 40 eq. 4-HC)

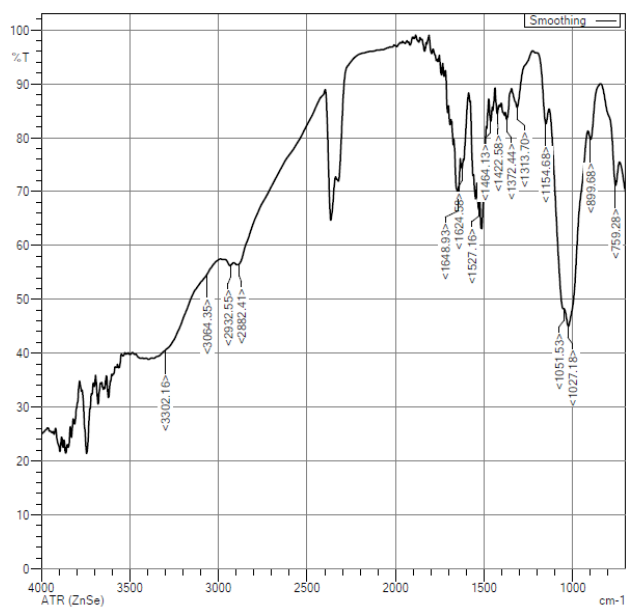

Figure S4. FT-IR of exhausted CS-MB swelled at pH 2.4

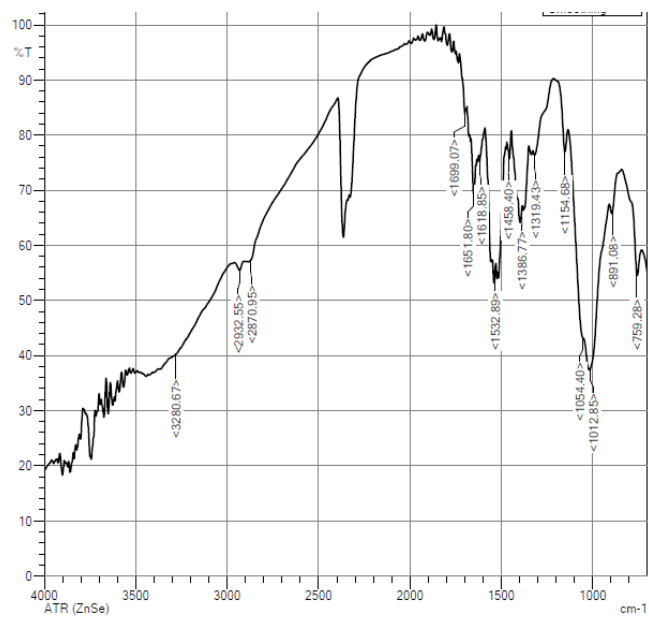

Figure S5. FT-IR of exhausted CS-MB swelled at pH 4.0

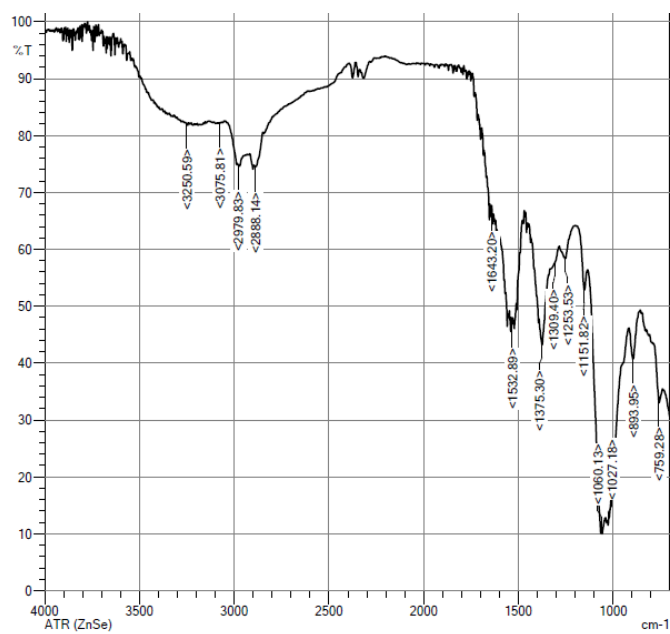

Figure S6. FT-IR of exhausted CS-MB swelled at pH 7.4

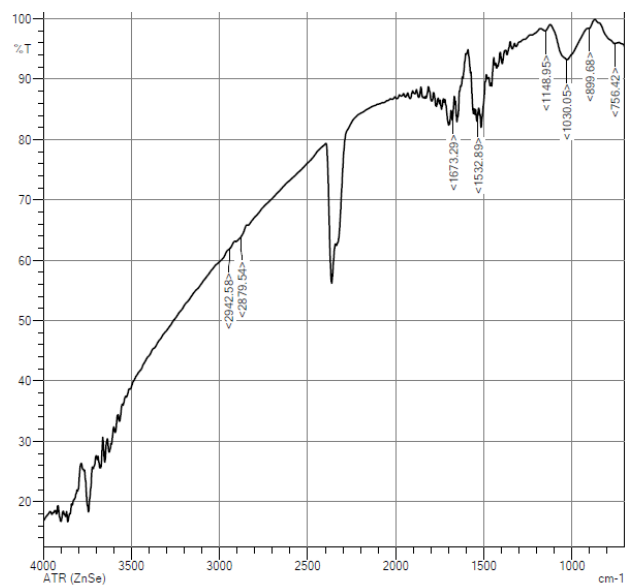

Figure S7. FT-IR of exhausted CS-MB swelled at pH 8.1

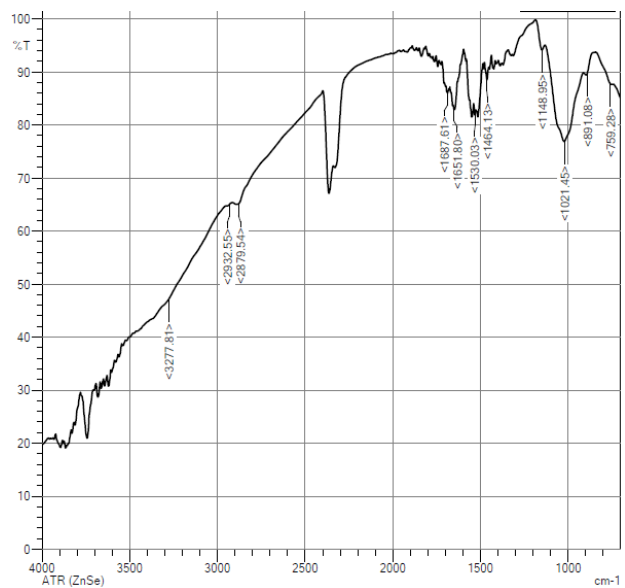

Figure S8. FT-IR of exhausted CS-MB swelled at pH 10.0

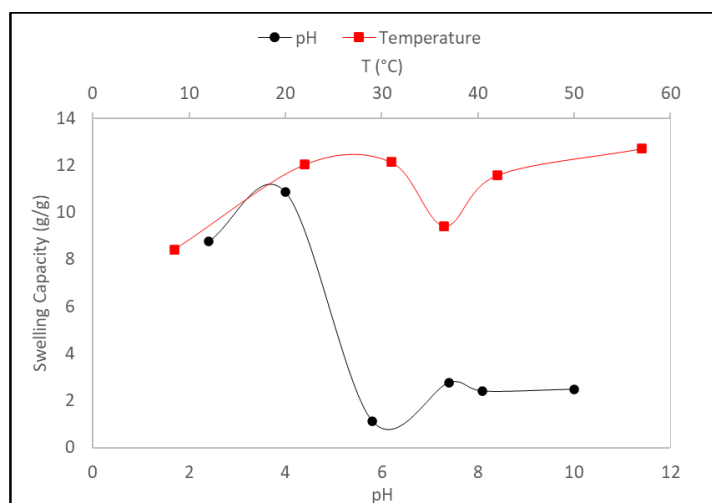

Figure S9: Influence of pH and temperature of water on the equilibrium swelling capacity of CS-MB.

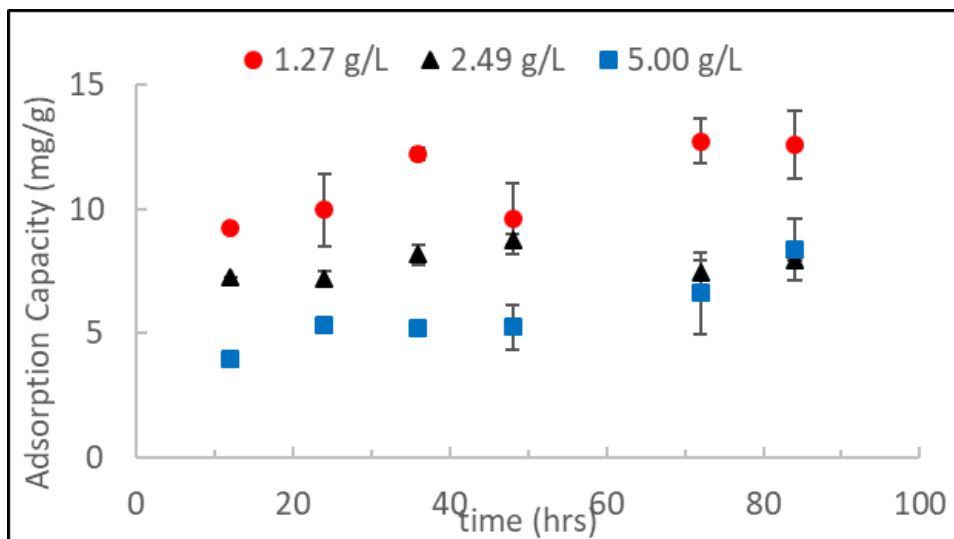

Figure S10: Adsorption equilibrium studies in batch mode with different CS-MB dosage. Conditions:  $[Cu^{2+}] = 120$  mg/L adjusted to pH 4 with AcOH/NaOAc, 20 mL working volume, 22°C, 140 rpm shaker speed.

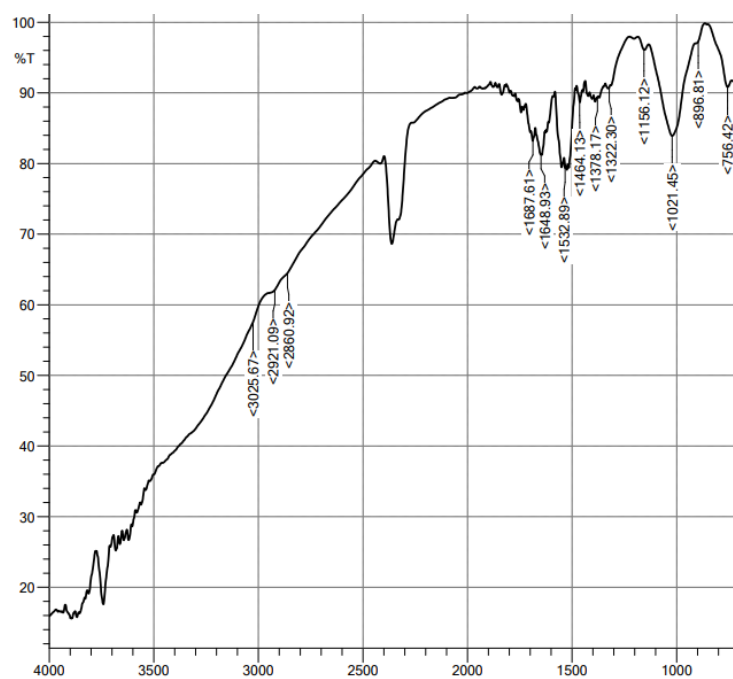

Figure S11: FT-IR of spent CS-MB

**Table S1 : pH-sensitivity of CS-MB at 22°C at normal atmospheric pressure**

| pH             | Observations/Explanations                                                                                                                                                                                                                                                                                                                                                                                                                                                                                                                                                                                                                                                                                                                                                   |
|----------------|-----------------------------------------------------------------------------------------------------------------------------------------------------------------------------------------------------------------------------------------------------------------------------------------------------------------------------------------------------------------------------------------------------------------------------------------------------------------------------------------------------------------------------------------------------------------------------------------------------------------------------------------------------------------------------------------------------------------------------------------------------------------------------|
| 2.4 > pH < 3.8 | <ul style="list-style-type: none"> <li>At pH =2.4, the amine groups in the CS-MB have a high degree of deprotonation.</li> <li>The lower swelling capacity of the CS-MB at this pH than at pH 3.8 is due to the excessive electrostatic repulsion caused by the fully-charged amine group (NH<sub>3</sub><sup>+</sup>).</li> <li>The excessive NH<sub>3</sub><sup>+</sup> repulsion hinders the attractive interaction between the oxygen atom in the water molecule and the nitrogen atom in NH<sub>3</sub><sup>+</sup>.</li> <li>The gradual increase in pH decreases the degree of amine protonation and electrostatic repulsion allowing ion-dipole interaction between water and NH<sub>3</sub><sup>+</sup> resulting in the improved swelling capacity.</li> </ul>    |
| 3.8            | <ul style="list-style-type: none"> <li>Optimal pH for the swelling capacity of CS-MB hydrogel at 22°C and is time dependent until swelling equilibrium is established.</li> </ul>                                                                                                                                                                                                                                                                                                                                                                                                                                                                                                                                                                                           |
| 5.5            | <ul style="list-style-type: none"> <li>An inflection point is observed and the swelling capacity converges to a single quantity independent of the swelling time, which is identified as the pK<sub>a</sub> of the amine group in the CS-MB.</li> </ul>                                                                                                                                                                                                                                                                                                                                                                                                                                                                                                                     |
| 5.5 < pH < 6.9 | <ul style="list-style-type: none"> <li>In this range, it is expected that the CS-MB is uncharged in this range causing a very minimal electrostatic interaction between water molecules and the polar groups of the hydrogel resulting in low water retention.</li> <li>It is observed that the swelling capacity decreases slightly with time.</li> <li>With the absence of electrostatic interactions at this condition, this trend may be speculated to be caused by a constant efflux of water out of the hydrogel overtime.</li> </ul>                                                                                                                                                                                                                                 |
| 7.5            | <ul style="list-style-type: none"> <li>A second inflection point is observed and the swelling capacity converges to approximately the same value independent of the swelling time, which is identified as the pK<sub>a</sub> of the hydroxyl group of the 4-HC in the CS-MB.</li> <li>Nowak et al. [1] reported that the pK<sub>a</sub> of the non-substituted 4-HC was reported to be 4.06, whereas enhancing the stabilizing interaction between the hydroxyl of the 4-HC and proton-stabilizing substituent in the C-3 substituted 4-HC increases the pK<sub>a</sub>.</li> <li>Possible proton-stabilizing interaction for CS-MB system can include OH...π interaction, OH...OH hydrogen bonding, OH...NH hydrogen bonding, and CH...O (crosslinking carbon).</li> </ul> |
| 7.5 < pH < 8.1 | <ul style="list-style-type: none"> <li>In this range, it is expected that there is a partial deprotonation of the hydroxyl groups from the 4-HC allowing the ion-dipole interaction between deprotonated hydroxyl group and the hydrogen atom of the water molecule, allowing water retention.</li> <li>Swelling capacity also improves with time, but not as much as when the system is at pH 3.8 that could be due to the stronger anion repulsion (relative to NH<sub>3</sub><sup>+</sup> repulsion) between the partially deprotonated hydroxyl that influence the accessibility of water molecules for ion-dipole interaction.</li> </ul>                                                                                                                              |
| >8.1           | <ul style="list-style-type: none"> <li>This pH range is the least operational condition for hydrogel in terms of swelling capacity.</li> <li>As the hydroxyl approaches a high degree of deprotonation, the oxyanion-oxyanion repulsion also becomes dominant overtime that may lead to complete inaccessibility of oxyanion for ion-dipole interaction with water.</li> </ul>                                                                                                                                                                                                                                                                                                                                                                                              |

**Table S2: Copper speciation in AcOH/NaOAc buffered system (pH =4.0, 0.1 M) simulated from Visual MINTEQ ver. 3.1 (released 2014) J. P. Gustafsson.**

| <b>Cu- species</b>      | <b>Total Concentration (%)</b> |
|-------------------------|--------------------------------|
| Cu <sup>2+</sup>        | 99.30                          |
| CuOH <sup>+</sup>       | 0.025                          |
| CuCl <sup>+</sup>       | 0.487                          |
| Cu-Acetate <sup>+</sup> | 0.184                          |

**Table S3: EDC elemental analysis (Wt %) of fresh and spent CS-MB.**

| <b>Samples</b>       | <b>C</b> | <b>N</b> | <b>O</b> | <b>Cl</b> | <b>Cu</b> | <b>Total</b> |
|----------------------|----------|----------|----------|-----------|-----------|--------------|
| CS-MB area #1        | 55.49    | 4.80     | 39.63    | 0.08      | 0.00      | 100.00       |
| CS-MB area #2        | 53.24    | 5.86     | 40.88    | 0.02      | 0.00      | 100.00       |
| CS-MB area #3        | 55.91    | 5.76     | 38.25    | 0.07      | 0.00      | 100.00       |
| CS-MB-spent area #1  | 51.50    | 4.50     | 35.88    | 0.20      | 7.93      | 100.00       |
| CS-MB- spent area #2 | 53.91    | 5.18     | 31.14    | 0.29      | 9.48      | 100.00       |
| CS-MB- spent area #3 | 53.28    | 5.23     | 32.32    | 0.16      | 9.01      | 100.00       |

## References

[1] Nowak, P.M.; Sagan, F.; Mitoraj, M.P. Origin of Remarkably Different Acidity of Hydroxycoumarins—Joint Experimental and Theoretical Studies. *J Phys Chem B* 2017, *121*, 4554–4561, doi:10.1021/acs.jpcc.7b01849.
